# Supplementary material for: Development and Implementation of a Culturally Appropriate Education Program to Increase Cervical Cancer Screening among Maasai Women in Rural Tanzania
Source: PubMed Central journal article supplement (PMC6798900; doi:10.5334/aogh.2503), 2019-10-17
Supplement: agh-85-1-2503-s1.pdf [file agh-85-1-2503-s1.pdf]

**Supplemental Table 1. 2018 Distribution of Attendance Post-Intervention**

| <b>Village</b> | <b>Total women<br/>screened for CACX</b> | <b>n Maasai<br/>(%)</b> | <b>Site for Educational Program</b> |
|----------------|------------------------------------------|-------------------------|-------------------------------------|
| SoitSambu      | 27                                       | 21 (78)                 | Market                              |
| Ololosokwan    | 4                                        | 2 (50)                  | Clinic                              |
| Arash          | 25                                       | 20 (80)                 | Community meeting                   |
| Piyaya         | 40                                       | 35 (88)                 | Market                              |
| Oloirobi       | 33                                       | 24 (73)                 | Clinic                              |
| Endulen        | 4                                        | 1 (25)                  | Clinic                              |
| DigoDigo       | 36                                       | 0 (0)                   | Market                              |
| Wasso          | 31                                       | 12 (39)                 | Market                              |
